# Supplementary material
Source: PubMed Central journal article supplement (PMC4712396)
Supplement: aasm.39.2.457s1.pdf [file aasm.39.2.457s1.pdf]

**Table S1.** Summary of regression analyses examining cross-sectional associations between sleep-timing variables and body mass index (N = 315), and homeostatic model assessment of insulin resistance (N = 312) excluding participants taking antihypertensive medication

| Variable                   | Unadjusted   |         | Adjusted <sup>a</sup> |         | Adjusted <sup>b</sup> |         |        |        |    |
|----------------------------|--------------|---------|-----------------------|---------|-----------------------|---------|--------|--------|----|
|                            | $\Delta R^2$ | $\beta$ | $\Delta R^2$          | $\beta$ | $\Delta R^2$          | $\beta$ |        |        |    |
| <b>BMI<sup>1</sup></b>     |              |         |                       |         |                       |         |        |        |    |
| Mean bedtime               | 0.007        | 0.081   | 0.001                 | 0.037   | -                     | -       |        |        |    |
| Bedtime variability        | 0.031        | 0.176   | ***                   | 0.002   | 0.050                 | -       | -      |        |    |
| Bedtime delay              | 0.002        | 0.040   |                       | 0.000   | -0.003                | -       | -      |        |    |
| Bedtime advance            | 0.036        | 0.189   | ***                   | 0.010   | 0.101                 | *       | -      |        |    |
| <b>HOMA-IR<sup>2</sup></b> |              |         |                       |         |                       |         |        |        |    |
| Mean bedtime               | 0.003        | 0.059   |                       | 0.000   | -0.010                | 0.001   | -0.032 |        |    |
| Bedtime variability        | 0.060        | 0.245   | ***                   | 0.022   | 0.159                 | **      | 0.014  | 0.127  | ** |
| Bedtime delay              | 0.015        | 0.125   | *                     | 0.012   | 0.112                 | *       | 0.013  | 0.114  | *  |
| Bedtime advance            | 0.016        | 0.125   | *                     | 0.003   | 0.055                 |         | 0.000  | -0.005 |    |

<sup>a</sup> Adjusted for race, menopausal status, exercise, depressive symptoms, and sleep duration; \*P < 0.05; \*\*P < 0.01; \*\*\*P < 0.001.

<sup>b</sup> Further adjusted for BMI.

<sup>1</sup>N = 315, <sup>2</sup>N = 312.

BMI = body mass index; HOMA-IR = homeostatic model assessment of insulin resistance.

**Table S2.** Summary of regression analyses examining prospective associations between sleep-timing variables and body mass index (N = 286) and homeostatic model assessment of insulin resistance (N = 223)

| Variable                   | Unadjusted   |         |     | Adjusted <sup>a</sup> |         | Adjusted <sup>b</sup> |         |       |   |
|----------------------------|--------------|---------|-----|-----------------------|---------|-----------------------|---------|-------|---|
|                            | $\Delta R^2$ | $\beta$ |     | $\Delta R^2$          | $\beta$ | $\Delta R^2$          | $\beta$ |       |   |
| <b>BMI<sup>1</sup></b>     |              |         |     |                       |         |                       |         |       |   |
| Mean bedtime               | 0.016        | 0.126   | *   | 0.000                 | 0.013   | 0.000                 | 0.014   |       |   |
| Bedtime variability        | 0.020        | 0.142   | *   | 0.000                 | -0.004  | 0.000                 | 0.002   |       |   |
| Bedtime delay              | 0.000        | -0.012  |     | 0.000                 | 0.014   | 0.000                 | 0.013   |       |   |
| Bedtime advance            | 0.035        | 0.187   | *** | 0.000                 | -0.007  | 0.000                 | -0.006  |       |   |
| <b>HOMA-IR<sup>2</sup></b> |              |         |     |                       |         |                       |         |       |   |
| Mean bedtime               | 0.001        | -0.023  |     | 0.003                 | -0.053  | 0.006                 | -0.084  |       |   |
| Bedtime variability        | 0.004        | 0.062   |     | 0.000                 | -0.013  | 0.002                 | -0.050  |       |   |
| Bedtime delay              | 0.016        | 0.125   | *   | 0.016                 | 0.127   | *                     | 0.016   | 0.127 | * |
| Bedtime advance            | 0.012        | 0.111   |     | 0.001                 | 0.026   | 0.001                 | -0.037  |       |   |

<sup>a</sup>Adjusted for BMI or HOMA-IR at Time 1.

<sup>b</sup>Further adjusted for race, menopausal status, exercise, depressive symptoms, sleep duration, and months between Time 1 and Time 2.

\*P < 0.05; \*\*P < 0.01; \*\*\*P < 0.001.

<sup>1</sup>N = 286; <sup>2</sup>N = 223.

BMI = body mass index; HOMA-IR = homeostatic model assessment of insulin resistance.
